# Supplementary material
Source: PubMed Central journal article supplement (PMC10514890)
Supplement: jamaoncol-e233634-s003.pdf [file jamaoncol-e233634-s003.pdf]

## Data Sharing Statement

Alexander. Risk-Directed Ambulatory Thromboprophylaxis in Lung and Gastrointestinal Cancers. *JAMA Oncol.* Published September 21, 2023. doi:10.1001/jamaoncol.2023.3634

### Data

**Data available:** Yes

**Data types:** Deidentified participant data

**How to access data:** [Marliese.Alexander@petermac.org](mailto:Marliese.Alexander@petermac.org)

**When available:** beginning date: 05-23-2026

### Supporting Documents

**Document types:** None

### Additional Information

**Who can access the data:** researchers whose proposed use of the data has been approved.

**Types of analyses:** for the purpose of meta-analysis

**Mechanisms of data availability:** after approval of a proposal and a signed data access agreement.
